# Supplementary material for: Adrenomedullin Expression Characterizes Leukemia Stem Cells and Associates With an Inflammatory Signature in Acute Myeloid Leukemia
Source: PubMed Central journal article supplement (PMC8208888; doi:10.3389/fonc.2021.684396), 2021-06-02
Supplement: DataSheet_1.pdf [file DataSheet_1.pdf]

## Supplementary Material

### Supplementary Figures

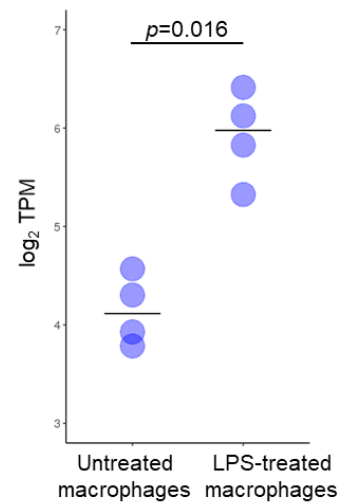

**Supplementary Figure 1. LPS-induced upregulation of *ADM* in macrophages.** Comparison of *ADM* levels between untreated and LPS-treated macrophages (day 6) from the BLEUPRINT dataset (TPM: Transcripts Per Million).

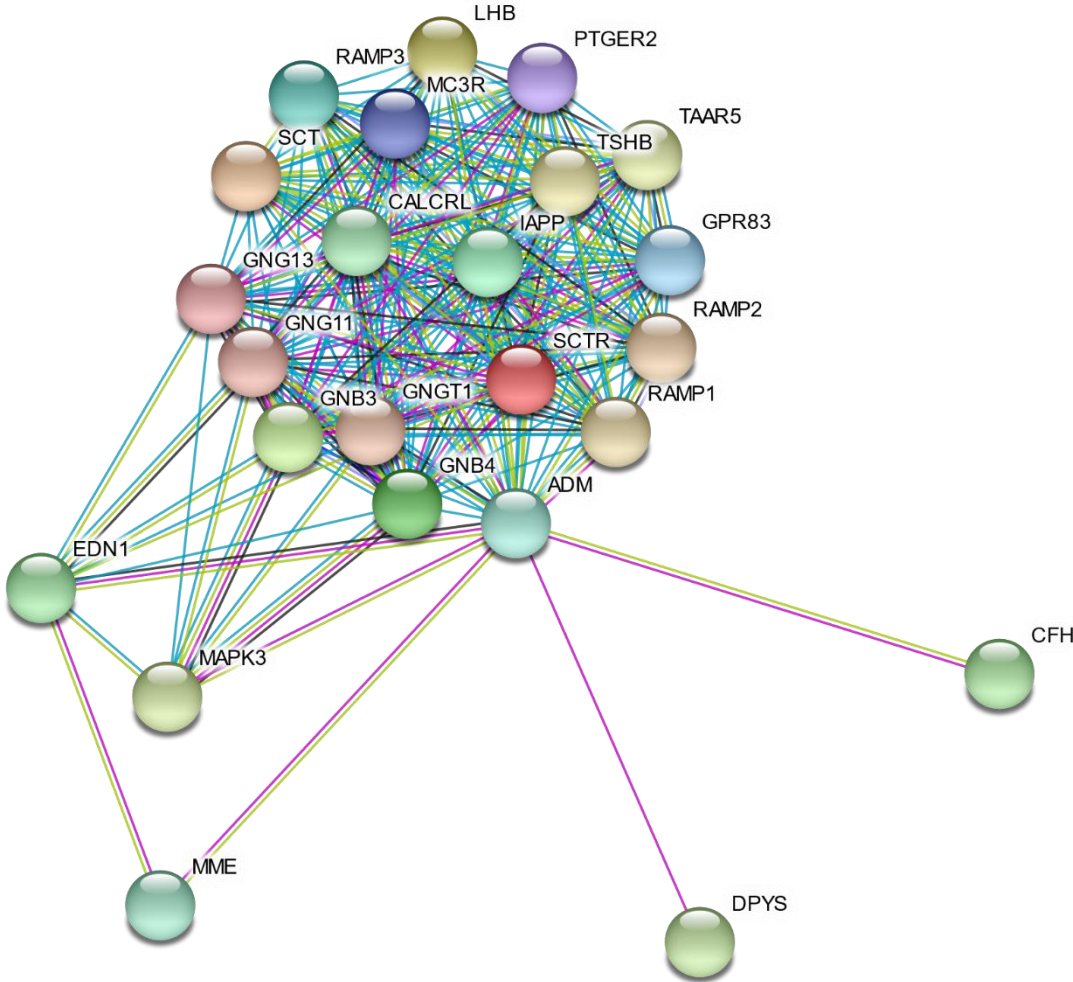

**Supplementary Figure 2. Protein-protein interaction network of the top-scoring ADM-interacting proteins.**

**Supplementary Tables**
**Supplementary Table 1. Datasets used in the manuscript.**

| <b>Dataset ID</b> | <b>Platform</b>                     | <b>Sample n. and type</b>                                                                                                                        | <b>Normalization</b>         | <b>Analysis</b>                                                               |
|-------------------|-------------------------------------|--------------------------------------------------------------------------------------------------------------------------------------------------|------------------------------|-------------------------------------------------------------------------------|
| BLUEPRINT         | RNA-seq                             | 119 hematopoietic cells                                                                                                                          | TPM                          | Hematopoietic cells and lineages                                              |
| GSE98791          | Agilent-021441                      | 45 hematopoietic cells                                                                                                                           | Processed Signal intensities | Hematopoietic cells and lineages                                              |
| GSE24759          | Affymetrix HT-HG-U133A Early Access | 158 hematopoietic cells                                                                                                                          | RMA                          | Hematopoietic cells and lineages                                              |
| GSE24006          | Affymetrix U133 Plus 2.0            | 23 AML and 23 hematopoietic cells at different stage of differentiation                                                                          | RMA                          | AML vs. normal subpopulations                                                 |
| GSE63270          | Affymetrix U133 Plus 2.0            | 41 AML and 35 hematopoietic cells at different stage of differentiation                                                                          | MAS5                         | AML vs. normal subpopulations                                                 |
| GSE158596         | RNA-seq                             | 60 AML (blasts >85%) and 16 healthy G-CSF mobilized CD34 <sup>+</sup> cells                                                                      | Median of ratios             | AML blasts vs. normal HSPC                                                    |
| GSE117090         | Affymetrix HTA 2.0                  | 58 AML and 14 hematopoietic cells at different stage of differentiation;<br>30 CD8 <sup>+</sup> T from AML and 7 CD8 <sup>+</sup> T from healthy | RMA                          | AML vs. normal subpopulations;<br>CD8 <sup>+</sup> T from AML vs. healthy     |
| GSE14924          | Affymetrix U133 Plus 2.0            | 10 CD4 <sup>+</sup> T from AML and 10 CD4 <sup>+</sup> T from healthy                                                                            | MAS 5.0                      | CD4 <sup>+</sup> T from AML vs. healthy                                       |
| NGS-PTL           | Affymetrix HTA 2.0                  | 61 AML BM MNCs (blasts ≥80%)<br>29 Ph <sup>-</sup> B-ALL MNCs                                                                                    | sst-RMA                      | AML vs. Ph <sup>-</sup> B-ALL;<br>AML and disease features; survival analyses |
| GSE14468          | Affymetrix U133 Plus 2.0            | 459 AML BM/PB MNCs                                                                                                                               | RMA                          | AML and disease features                                                      |
| GSE6891           | Affymetrix U133 Plus 2.0            | 68 AML BM MNCs; 410 AML PB MNCs                                                                                                                  | RMA                          | AML and disease features; survival analyses                                   |
| GSE13159          | Affymetrix U133 Plus 2.0            | 505 AML BM MNCs; 173 T-ALL MNCs;<br>441 B-ALL MNCs; 134 ALL NOS MNCs                                                                             | RMA                          | AML vs. ALL;<br>AML and disease features                                      |
| Beat AML          | RNA-seq                             | 142 AML BM MNCs; 87 AML PB MNCs;<br>19 normal BM MNCs                                                                                            | CPM (TMM)                    | AML and disease features; survival analyses                                   |
| TCGA-LAML         | RNA-seq                             | 135 BM MNCs                                                                                                                                      | CPM (TMM)                    | AML and disease features; survival analyses                                   |

BM: bone marrow; CPM: Counts Per Million; G-CSF: granulocyte colony-stimulating factor; MNCs: mononuclear cells; NOS: not otherwise specified; PB: peripheral blood; RMA: robust multi-array average; sst-RMA: signal space transformation RMA; TMM: Trimmed Mean of M values; TPM: Transcripts Per Million; vs.: *versus*.

**Supplementary Table 2. Association between *ADM* expression levels and clinical/molecular data in the GSE13159 and NGS-PTL cohorts.**

| Variable                 | GSE13159 (n=458) |                     |                  | NGS-PTL (n=61) |                     |          |
|--------------------------|------------------|---------------------|------------------|----------------|---------------------|----------|
|                          | n (%)            | median [min-max]    | <i>p</i>         | n (%)          | median [min-max]    | <i>p</i> |
| <b>Age</b>               | <i>NA</i>        | <i>NA</i>           | -                |                |                     | 0.130    |
| <60-years                |                  |                     |                  | 17 (30.4)      | 20.9 [15.9-29.3]    |          |
| ≥60-years                |                  |                     |                  | 39 (69.6)      | 23.4 [15.2-67.5]    |          |
| <i>missing</i>           |                  |                     |                  | 5              |                     |          |
| <b>FAB</b>               | <i>NA</i>        | <i>NA</i>           | -                |                |                     | 0.468    |
| M0                       |                  |                     |                  | 4 (11.4)       | 22.1 [18.9-29.3]    |          |
| M1                       |                  |                     |                  | 8 (22.9)       | 18.7 [15.2-39.1]    |          |
| M2                       |                  |                     |                  | 7 (20.0)       | 25.4 [16.1-58.4]    |          |
| M4                       |                  |                     |                  | 10 (28.6)      | 23.8 [19.2-55.5]    |          |
| M5                       |                  |                     |                  | 6 (17.1)       | 24.9 [16.4-56.3]    |          |
| M6                       |                  |                     |                  | -              |                     |          |
| M7                       |                  |                     |                  | -              |                     |          |
| <i>missing</i>           |                  |                     |                  | 26             |                     |          |
| <b>Cytogenetic group</b> |                  |                     | <b>&lt;0.001</b> |                |                     | 0.076    |
| t(8;21)                  | 35 (7.6)         | 79.9 [13.6-584.1]   |                  | 3 (4.9)        | 20.03 [19.73-24.65] |          |
| inv(16)/t(16;16)         | 27 (5.9)         | 243.9 [25.8-1552.1] |                  | 2 (3.3)        | 32.05 [23.43-36.36] |          |
| NK                       | -                |                     |                  | 31 (50.8)      | 20.55 [15.17-40.35] |          |
| CK                       | 45 (9.8)         | 393.4 [31.1-2033.9] |                  | 9 (14.8)       | 24.53 [16.05-36.28] |          |
| <i>KMT2A-r</i>           | 29 (6.3)         | 51.3 [12.9-3541.1]  |                  | 1 (1.6)        | 16.37               |          |
| Other                    | -                |                     |                  | 15 (24.6)      | 23.38 [18.71-30.18] |          |
| Normal/Other*            | 322 (70.3)       | 186.8 [12.0-5712.9] |                  | -              |                     |          |

\* “NK” and “other” cytogenetic subgroups were not distinguished in GSE13159 dataset (CK: complex karyotype; *KMT2A-r*: *KMT2A*-rearranged; min-max: minimum-to-maximum value; mut: mutated; n: number; *NA*: not available; NK: normal karyotype; *p*: *p* value;  $p \leq 0.05$  are highlighted as bold text).

**Supplementary Table 3. List of genes co-expressed with ADM in AML.**

| Gene           | Pearson correlation coefficient | log <sub>10</sub> p | Gene           | Pearson correlation coefficient | log <sub>10</sub> p | Gene            | Pearson correlation coefficient | log <sub>10</sub> p |
|----------------|---------------------------------|---------------------|----------------|---------------------------------|---------------------|-----------------|---------------------------------|---------------------|
| <i>ADAM9</i>   | 0.579                           | 4.015               | <i>GNGT2</i>   | 0.657                           | 4.305               | <i>RASGEF1B</i> | 0.584                           | 7.957               |
| <i>ANXA5</i>   | 0.509                           | 6.054               | <i>GNS</i>     | 0.546                           | 5.668               | <i>RASL11A</i>  | 0.556                           | 5.228               |
| <i>AQP9</i>    | 0.640                           | 8.551               | <i>GPR137B</i> | 0.736                           | 6.910               | <i>RASSF5</i>   | 0.597                           | 5.907               |
| <i>ASAH1</i>   | 0.574                           | 5.736               | <i>HBEGF</i>   | 0.524                           | 5.042               | <i>RGL1</i>     | 0.599                           | 4.405               |
| <i>BATF2</i>   | 0.578                           | 6.109               | <i>HCK</i>     | 0.564                           | 4.162               | <i>RND3</i>     | 0.726                           | 6.862               |
| <i>BCL2A1</i>  | 0.576                           | 4.710               | <i>ID2</i>     | 0.542                           | 7.576               | <i>RNF141</i>   | 0.678                           | 6.002               |
| <i>BIRC3</i>   | 0.638                           | 9.134               | <i>IER5</i>    | 0.580                           | 13.012              | <i>RNF144B</i>  | 0.680                           | 9.486               |
| <i>BTG1</i>    | 0.549                           | 6.123               | <i>IFI30</i>   | 0.628                           | 13.143              | <i>RRAS</i>     | 0.637                           | 6.713               |
| <i>CIQA</i>    | 0.749                           | 5.471               | <i>IL10RA</i>  | 0.640                           | 8.606               | <i>SAT1</i>     | 0.566                           | 9.382               |
| <i>C3</i>      | 0.567                           | 7.755               | <i>IL21R</i>   | 0.591                           | 4.295               | <i>SDCBP</i>    | 0.554                           | 6.376               |
| <i>C5AR1</i>   | 0.647                           | 5.571               | <i>IL6</i>     | 0.808                           | 9.583               | <i>SECTM1</i>   | 0.694                           | 7.305               |
| <i>CARD16</i>  | 0.672                           | 7.557               | <i>JUNB</i>    | 0.583                           | 8.895               | <i>SERPINA1</i> | 0.668                           | 7.137               |
| <i>CASP5</i>   | 0.535                           | 6.141               | <i>LILRA1</i>  | 0.573                           | 5.487               | <i>SGK1</i>     | 0.511                           | 6.331               |
| <i>CCL2</i>    | 0.568                           | 10.073              | <i>LILRA5</i>  | 0.742                           | 8.385               | <i>SGTB</i>     | 0.601                           | 4.775               |
| <i>CCL20</i>   | 0.548                           | 7.172               | <i>LILRB1</i>  | 0.742                           | 8.416               | <i>SIDT2</i>    | 0.675                           | 5.748               |
| <i>CD55</i>    | 0.556                           | 8.286               | <i>LILRB2</i>  | 0.689                           | 9.583               | <i>SKIL</i>     | 0.593                           | 8.513               |
| <i>CD83</i>    | 0.573                           | 8.287               | <i>LTA4H</i>   | 0.552                           | 4.627               | <i>SLA</i>      | 0.586                           | 9.881               |
| <i>CDKN1A</i>  | 0.558                           | 9.767               | <i>LY96</i>    | 0.654                           | 4.996               | <i>SLC15A3</i>  | 0.626                           | 9.988               |
| <i>CDKN2D</i>  | 0.522                           | 3.913               | <i>LYN</i>     | 0.597                           | 7.968               | <i>SLC16A6</i>  | 0.566                           | 4.296               |
| <i>CEBPB</i>   | 0.552                           | 4.684               | <i>MAFB</i>    | 0.733                           | 11.842              | <i>SLC2A3</i>   | 0.539                           | 8.925               |
| <i>CHST7</i>   | 0.650                           | 6.838               | <i>MARCO</i>   | 0.787                           | 5.500               | <i>SLC2A6</i>   | 0.524                           | 7.446               |
| <i>CNEP1R1</i> | 0.526                           | 5.071               | <i>MASTL</i>   | 0.529                           | 4.278               | <i>SLC43A2</i>  | 0.578                           | 5.484               |
| <i>CTSB</i>    | 0.553                           | 6.695               | <i>MBD2</i>    | 0.713                           | 8.557               | <i>SLC8A1</i>   | 0.550                           | 6.708               |
| <i>CTSH</i>    | 0.557                           | 5.156               | <i>METRNL</i>  | 0.648                           | 9.871               | <i>SLC9A9</i>   | 0.656                           | 5.088               |
| <i>CTSL</i>    | 0.690                           | 7.433               | <i>MYD88</i>   | 0.569                           | 6.706               | <i>SMPDL3A</i>  | 0.684                           | 7.176               |
| <i>CTSS</i>    | 0.603                           | 6.756               | <i>MYOF</i>    | 0.574                           | 7.344               | <i>SNORD89</i>  | 0.550                           | 6.345               |
| <i>CXCL10</i>  | 0.572                           | 10.280              | <i>NAMPT</i>   | 0.596                           | 9.139               | <i>SNX18</i>    | 0.605                           | 11.322              |
| <i>CYBB</i>    | 0.591                           | 8.747               | <i>NFKBIZ</i>  | 0.532                           | 7.946               | <i>SOCS3</i>    | 0.622                           | 5.683               |
| <i>DIRC2</i>   | 0.552                           | 9.093               | <i>NINJI</i>   | 0.531                           | 12.265              | <i>STX11</i>    | 0.551                           | 8.125               |
| <i>EDN1</i>    | 0.663                           | 5.238               | <i>OTUD1</i>   | 0.673                           | 4.683               | <i>TAGLN</i>    | 0.669                           | 6.382               |
| <i>EXT1</i>    | 0.658                           | 6.317               | <i>PELI1</i>   | 0.638                           | 7.992               | <i>TBC1D8</i>   | 0.547                           | 6.610               |
| <i>FAM20A</i>  | 0.746                           | 6.650               | <i>PFKFB3</i>  | 0.628                           | 12.509              | <i>TCF7L2</i>   | 0.516                           | 6.157               |
| <i>FCER1G</i>  | 0.637                           | 4.473               | <i>PHLDA2</i>  | 0.562                           | 9.342               | <i>THEMIS2</i>  | 0.504                           | 5.691               |
| <i>FCGR3A</i>  | 0.689                           | 13.723              | <i>PILRA</i>   | 0.548                           | 5.928               | <i>TMEM127</i>  | 0.582                           | 7.441               |
| <i>FFAR2</i>   | 0.644                           | 12.890              | <i>PLAUR</i>   | 0.599                           | 4.317               | <i>TNFAIP3</i>  | 0.641                           | 10.042              |
| <i>FMNL2</i>   | 0.694                           | 5.708               | <i>PLEKHO2</i> | 0.643                           | 4.925               | <i>TNFAIP6</i>  | 0.619                           | 5.150               |
| <i>FPR1</i>    | 0.567                           | 7.561               | <i>PLK2</i>    | 0.525                           | 4.312               | <i>TNFRSF1B</i> | 0.622                           | 7.065               |
| <i>FTH1</i>    | 0.636                           | 7.889               | <i>PPT1</i>    | 0.556                           | 4.338               | <i>TNNT1</i>    | 0.549                           | 4.738               |
| <i>FTH1P5</i>  | 0.736                           | 7.885               | <i>PRKACA</i>  | 0.670                           | 7.720               | <i>TPD52L2</i>  | 0.543                           | 3.952               |
| <i>FTL</i>     | 0.606                           | 7.220               | <i>PSAP</i>    | 0.670                           | 6.291               | <i>TSPAN14</i>  | 0.617                           | 7.650               |
| <i>G0S2</i>    | 0.590                           | 10.802              | <i>PTP4A2</i>  | 0.606                           | 6.832               | <i>UPPI</i>     | 0.534                           | 9.548               |
| <i>GADD45B</i> | 0.599                           | 9.033               | <i>PTPRJ</i>   | 0.573                           | 7.196               | <i>VASP</i>     | 0.578                           | 5.388               |
| <i>GBP2</i>    | 0.562                           | 6.289               | <i>RAB8B</i>   | 0.554                           | 5.483               | <i>ZFAND5</i>   | 0.542                           | 6.582               |
| <i>GCH1</i>    | 0.576                           | 7.226               | <i>RABGEF1</i> | 0.518                           | 5.577               | <i>ZFP36L1</i>  | 0.612                           | 9.440               |
| <i>GLTP</i>    | 0.573                           | 6.039               | <i>RAP2B</i>   | 0.539                           | 8.978               | <i>ZNF703</i>   | 0.652                           | 4.244               |

Pearson correlation coefficient and *p* represent the weighted arithmetic mean of the correlation coefficient and of the *p* value across the datasets, respectively.

**Supplementary Table 4. Pathway enrichment analysis of genes co-expressed with *ADM* in AML.**

|                                  | Collection | Term                                                               | Adj- <i>p</i> | Genes                                                                                                                                                                                             |
|----------------------------------|------------|--------------------------------------------------------------------|---------------|---------------------------------------------------------------------------------------------------------------------------------------------------------------------------------------------------|
| Immune response and inflammation | React      | Immune System                                                      | 3.12E-06      | C1QA;CDKN1A;C5AR1;LY96;TNFAIP3;PTPRJ;LILRA1;IFI30;CTSS;LILRA5;C3;SOCS3;FCGR3A;CTSL;CTSH;PRKACA;GBP2;CD55;CTSB;VASP;LYN;FCER1G;CYBB;LILRB1;LILRB2;TNFRSF1B;HCK;RNF144B;IL6;PELI1;MYD88;HBEGF;BIRC3 |
|                                  | GO-BP      | regulation of immune response                                      | 3.68E-02      | C3;LYN;FCGR3A;LILRB1;PILRA;LILRA1;LILRB2;BIRC3                                                                                                                                                    |
|                                  | GO-BP      | leukocyte differentiation                                          | 1.31E-02      | LYN;RRAS;LILRB1                                                                                                                                                                                   |
|                                  | React      | Adaptive Immune System                                             | 1.52E-04      | VASP;LYN;CDKN1A;CYBB;PTPRJ;LILRB1;LILRA1;LILRB2;IFI30;CTSS;LILRA5;C3;SOCS3;RNF144B;FCGR3A;CTSL;CTSH;PRKACA;CTSB;HBEGF                                                                             |
|                                  | React      | Innate Immune System                                               | 1.06E-03      | LYN;C1QA;CDKN1A;FCER1G;C5AR1;LY96;TNFAIP3;CTSS;C3;HCK;FCGR3A;CTSL;PELI1;PRKACA;MYD88;CD55;CTSB;HBEGF;BIRC3                                                                                        |
|                                  | KEGG       | Antigen processing and presentation                                | 2.36E-02      | CTSL;IFI30;CTSS;CTSB                                                                                                                                                                              |
|                                  | GO-BP      | dendritic cell differentiation                                     | 4.15E-02      | LYN;BATF2;LILRB1                                                                                                                                                                                  |
|                                  | GO-BP      | regulation of defense response                                     | 2.06E-02      | HCK;CASP5;TNFAIP3;MYD88;BIRC3                                                                                                                                                                     |
|                                  | GO-BP      | cellular response to molecule of bacterial origin                  | 3.40E-06      | CXCL10;IL6;TNFAIP3;ADAM9;CCL2;LILRB1;CARD16;LILRB2;TNFRSF1B                                                                                                                                       |
|                                  | GO-BP      | pattern recognition receptor signaling pathway                     | 3.23E-04      | CTSL;LY96;FFAR2;CTSS;MYD88;CTSB                                                                                                                                                                   |
|                                  | GO-BP      | immune response-regulating cell surface receptor signaling pathway | 8.39E-03      | LYN;LILRB1;LILRB2                                                                                                                                                                                 |
|                                  | KEGG       | Toll-like receptor signaling pathway                               | 4.64E-02      | CXCL10;IL6;LY96;MYD88                                                                                                                                                                             |
|                                  | GO-BP      | toll-like receptor signaling pathway                               | 5.21E-03      | CTSL;LY96;CTSS;MYD88;CTSB;BIRC3                                                                                                                                                                   |
|                                  | React      | Toll-Like Receptors Cascades                                       | 1.78E-02      | CTSL;PELI1;LY96;MYD88;CTSS;CTSB;BIRC3                                                                                                                                                             |
|                                  | React      | Trafficking and processing of endosomal TLR                        | 2.09E-02      | CTSL;CTSS;CTSB                                                                                                                                                                                    |
|                                  | GO-BP      | neutrophil activation involved in immune response                  | 3.20E-13      | ASAH1;SERPINA1;TNFAIP6;C5AR1;FPR1;PTPRJ;SLC2A3;GNS;CTSS;C3;SDCBP;FTH1;PSAP;CTSH;LTA4H;CD55;CTSB;FCER1G;PLAUR;CYBB;LILRB2;TNFRSF1B;TSPAN14;RAP2B;PLEKHO2;FTL                                       |
|                                  | GO-BP      | neutrophil mediated immunity                                       | 1.12E-13      | ASAH1;SERPINA1;TNFAIP6;C5AR1;FPR1;PTPRJ;SLC2A3;GNS;CTSS;C3;SDCBP;FTH1;PSAP;CTSH;LTA4H;CD55;CTSB;FCER1G;PLAUR;CYBB;LILRB2;TNFRSF1B;IL6;TSPAN14;RAP2B;PLEKHO2;FTL                                   |

|                              |       |                                               |          |                                                                                                                                                             |
|------------------------------|-------|-----------------------------------------------|----------|-------------------------------------------------------------------------------------------------------------------------------------------------------------|
|                              | GO-BP | neutrophil degranulation                      | 3.93E-13 | ASAH1;SERPINA1;TNFAIP6;C5AR1;FPR1;PTPRJ;SLC2A3;GNS;CTSS;C3;SDCBP;FTH1;PSAP;CTSH;LTA4H;CD55;CTSB;FCER1G;PLAUR;CYBB;LILRB2;TNFRSF1B;TSPAN14;RAP2B;PLEKHO2;FTL |
|                              | KEGG  | Phagosome                                     | 1.06E-02 | C3;MARCO;FCGR3A;CTSL;CYBB;CTSS                                                                                                                              |
|                              | KEGG  | Fc gamma R-mediated phagocytosis              | 3.85E-02 | LYN;VASP;HCK;FCGR3A                                                                                                                                         |
|                              | KEGG  | Complement and coagulation cascades           | 9.67E-04 | C3;C1QA;SERPINA1;C5AR1;PLAUR;CD55                                                                                                                           |
|                              | GO-BP | inflammatory response                         | 3.93E-04 | LYN;CXCL10;IL6;CEBPB;TNFAIP6;CCL20;C5AR1;FPR1;CYBB;CCL2;TNFRSF1B                                                                                            |
|                              | GO-BP | regulation of acute inflammatory response     | 2.20E-02 | C3;C1QA;IL6;C5AR1;FFAR2;CD55                                                                                                                                |
|                              | GO-BP | regulation of inflammatory response           | 3.83E-03 | HCK;TNFAIP6;CASP5;TNFAIP3;FFAR2;METRNL;MYD88;BIRC3                                                                                                          |
|                              | GO-BP | regulation of interleukin-6 production        | 2.21E-02 | IL6;TNFAIP3;LILRB2;MYD88                                                                                                                                    |
| Cellular response to stimuli | KEGG  | Chemokine signaling pathway                   | 6.39E-03 | LYN;CXCL10;HCK;GNGT2;CCL20;CCL2;PRKACA                                                                                                                      |
|                              | GO-BP | cellular response to cytokine stimulus        | 3.23E-03 | CDKN1A;CCL20;IL10RA;FPR1;TNFRSF1B;ZFP36L1;SOCS3;CXCL10;HCK;IL6;CCL2;PRKACA;JUNB                                                                             |
|                              | KEGG  | Cytokine-cytokine receptor interaction        | 4.10E-02 | CXCL10;IL6;CCL20;IL10RA;IL21R;CCL2;TNFRSF1B                                                                                                                 |
|                              | GO-BP | lipopolysaccharide-mediated signaling pathway | 2.07E-02 | LYN;HCK;CCL2                                                                                                                                                |
|                              | GO-BP | response to lipopolysaccharide                | 5.30E-07 | CXCL10;IL6;GCH1;ADAM9;LY96;TNFAIP3;CCL2;LILRB1;CARD16;LILRB2;TNFRSF1B;JUNB                                                                                  |
|                              | GO-BP | cellular response to lipopolysaccharide       | 3.34E-08 | LYN;HCK;CXCL10;IL6;TNFAIP3;ADAM9;CCL2;LILRB1;CARD16;LILRB2;TNFRSF1B                                                                                         |
|                              | GO-BP | cytokine-mediated signaling pathway           | 1.37E-04 | CDKN1A;CCL20;IL10RA;FPR1;IFI30;TNFRSF1B;SOCS3;CXCL10;HCK;IL6;PELI1;IL21R;CCL2;PRKACA;GBP2;JUNB;MYD88;BIRC3                                                  |
|                              | GO-BP | cellular response to lipid                    | 2.22E-06 | LYN;CXCL10;IL6;ZNF703;ADAM9;TNFAIP3;CCL2;FFAR2;LILRB1;CARD16;LILRB2;TNFRSF1B                                                                                |
|                              | GO-BP | response to lipid                             | 8.48E-03 | CDKN2D;CXCL10;GCH1;LY96;CTSH;TNFRSF1B;JUNB                                                                                                                  |
| Signaling pathways           | KEGG  | NF-kappa B signaling pathway                  | 2.83E-04 | LYN;BCL2A1;GADD45B;TNFAIP3;LY96;MYD88;BIRC3                                                                                                                 |
|                              | KEGG  | NOD-like receptor signaling pathway           | 5.40E-06 | IL6;CASP5;NAMPT;CYBB;TNFAIP3;CCL2;CARD16;GBP2;MYD88;CTSB;BIRC3                                                                                              |
|                              | KEGG  | FoxO signaling pathway                        | 6.08E-03 | CDKN2D;IL6;CDKN1A;GADD45B;PLK2;SGK1                                                                                                                         |
|                              | KEGG  | HIF-1 signaling pathway                       | 1.00E-02 | IL6;CDKN1A;EDN1;PFKFB3;CYBB                                                                                                                                 |
|                              | KEGG  | JAK-STAT signaling pathway                    | 4.56E-02 | SOCS3;IL6;CDKN1A;IL10RA;IL21R                                                                                                                               |
|                              | KEGG  | IL-17 signaling pathway                       | 1.36E-03 | CXCL10;CEBPB;IL6;CCL20;TNFAIP3;CCL2                                                                                                                         |
|                              | KEGG  | TNF signaling pathway                         | 6.53E-08 | SOCS3;CXCL10;IL6;EDN1;CEBPB;CCL20;TNFAIP3;CCL2;TNFRSF1B;JUNB;BIRC3                                                                                          |

Supplementary Material

|                                    |       |                                                                                           |          |                                                                                                                                               |
|------------------------------------|-------|-------------------------------------------------------------------------------------------|----------|-----------------------------------------------------------------------------------------------------------------------------------------------|
| Cell growth                        | GO-BP | regulation of cell growth                                                                 | 4.74E-02 | CDKN2D;SDCBP;CDKN1A;BTG1;PPT1;PTPRJ;SGK1                                                                                                      |
|                                    | GO-BP | regulation of cell proliferation                                                          | 1.56E-07 | LYN;CDKN2D;TCF7L2;CDKN1A;EDN1;BTG1;TBC1D8;SLA;PTPRJ;TNFRSF1B;ZFP36L1;SDCBP;CXCL10;HCK;IL6;TMEM127;FTH1;NAMPT;ZNF703;CTSH;SGK1;IER5;JUNB;HBEGF |
|                                    | GO-BP | negative regulation of lymphocyte proliferation                                           | 7.82E-03 | LYN;CEBPB;LILRB1;LILRB2                                                                                                                       |
| Cellular senescence and cell death | GO-BP | regulation of nitric-oxide synthase biosynthetic process                                  | 1.04E-02 | EDN1;NAMPT;CCL2                                                                                                                               |
|                                    | GO-BP | cellular response to oxygen-containing compound                                           | 2.53E-05 | LYN;TNFAIP3;LILRB1;LILRB2;TNFRSF1B;ZFP36L1;CXCL10;IL6;ZNF703;ADAM9;CCL2;FFAR2;CARD16                                                          |
|                                    | KEGG  | Ferroptosis                                                                               | 3.86E-03 | FTH1;CYBB;SAT1;FTL                                                                                                                            |
|                                    | KEGG  | Apoptosis                                                                                 | 1.64E-03 | GADD45B;BCL2A1;CTSL;CTSH;CTSS;CTSB;BIRC3                                                                                                      |
|                                    | GO-BP | regulation of apoptotic process                                                           | 1.71E-02 | GADD45B;BCL2A1;PLK2;ANXA5;PLAUR;LILRB1;TNFRSF1B;HCK;RNF144B;IL6;PPT1;CTSH;SGK1;MYD88;CTSB;BIRC3                                               |
|                                    | GO-BP | negative regulation of apoptotic process                                                  | 3.71E-04 | CDKN2D;BCL2A1;PLK2;ANXA5;PLAUR;TNFRSF1B;HCK;RNF144B;IL6;PPT1;CTSH;CCL2;CARD16;MYD88;BIRC3                                                     |
|                                    | GO-BP | negative regulation of programmed cell death                                              | 1.51E-02 | HCK;RNF144B;IL6;BCL2A1;PLK2;ANXA5;PPT1;PLAUR;CTSH;MYD88;BIRC3                                                                                 |
|                                    | GO-BP | negative regulation of cysteine-type endopeptidase activity involved in apoptotic process | 1.45E-02 | CDKN2D;PLAUR;CARD16;TNFRSF1B;BIRC3                                                                                                            |
|                                    | KEGG  | Cellular senescence                                                                       | 1.18E-02 | IL6;CDKN1A;RRAS;GADD45B;RASSF5;ZFP36L1                                                                                                        |
|                                    | KEGG  | Necroptosis                                                                               | 4.42E-02 | FTH1;CYBB;TNFAIP3;FTL;BIRC3                                                                                                                   |

Adj: adjusted; GO-BP: Gene Ontology Biological Processes; React: Reactome.
